# Supplementary material for: Late Holocene pteropod distribution across the base of the south-eastern Mediterranean margin: the importance of the > 63 µm fraction
Source: Copernicus journal article supplement (doi:10.5194/jm-42-13-2023), 2023-03-17
Supplement: Supplementary file 1 [file jm-42-13-2023-supplement.zip]

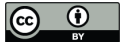

*Supplement of*

**Late Holocene pteropod distribution across the base of the south-eastern Mediterranean margin: the importance of the  $> 63 \mu\text{m}$  fraction**

**Valentina Beccari et al.**

*Correspondence to:* Silvia Spezzaferri ([silvia.spezzaferri@unifr.ch](mailto:silvia.spezzaferri@unifr.ch))

- [jm-42-13-2023-supplement-title-page.pdf](#)
- SupplementaryMaterial
  - .DS\_Store
  - SM1-counts and dating.xlsx
  - SM2-geochem.xlsx

The copyright of individual parts of the supplement might differ from the article licence.
