# Supplementary material for: Late Holocene pteropod distribution across the base of the south-eastern Mediterranean margin: the importance of the > 63 µm fraction
Source: Copernicus journal article supplement (doi:10.5194/jm-42-13-2023), 2023-03-17
Supplement: Supplementary file 1 [file SM1-counts and dating.xlsx]

## Sheet: AG16-20-BC1b >63um
				Original weight=		24.03				Original weight=		34.83				Original weight=		51.55			Original weight=		33.42					Original weight=		38.99				Original weight=		9.738				Original weight=		26.89				Original weight=		36.86
		0-1 cm						2-3 cm						4-5 cm						6-7 cm						8-9 cm						10-11 cm						12-13 cm						14-15 cm
		>250	125-250	63-125	total	normalized	percentage	>250	125-250	63-125	total	normalized	percentage	>250	125-250	63-125	total	normalized	percentage	>250	125-250	63-125	total	normalized	percentage	>250	125-250	63-125	total	normalized	percentage	>250	125-250	63-125	total	normalized	percentage	>250	125-250	63-125	total	normalized	percentage	>250	125-250	63-125	total	normalized	percentage
Heliconoides inflatus (d'Orbigny, 1935)	mesopelagic	2	15	60	77	3.20433	6.48148	6	20	112	138	3.9621	6.46067	3	63	256	322	6.24636	10.441	2	29	56	87	2.60323	4.96009	3	27	156	186	4.77045	7.20651	6	34	144	184	18.8951	7.95848	0	21	200	221	8.21867	10.7595	93	428	1792	2313	62.7509	22.7747
Limacina bulimoides (d'Orbigny, 1935)	mesopelagic	0	17	48	65	2.70495	5.47138	1	19	156	176	5.05312	8.2397	0	30	224	254	4.92726	8.23606	1	7	80	88	2.63315	5.0171	1	31	128	160	4.10362	6.19915	0	37	288	325	33.3744	14.0571	0	37	168	205	7.62365	9.98053	13	276	1056	1345	36.4894	13.2434
Limacina trochiformis (d'Orbigny, 1935)	epipelagic	2	18	12	32	1.33167	2.6936	0	29	24	53	1.52168	2.48127	0	14	88	102	1.97866	3.30739	0	6	12	18	0.5386	1.02623	0	39	32	71	1.82098	2.75087	2	29	104	135	13.8632	5.8391	0	7	36	43	1.59911	2.09348	0	36	0	36	0.976668	0.35447
Creseis acicula (Rang, 1828)	epipelagic	18	32	48	98	4.07824	8.24916	16	35	72	123	3.53144	5.75843	10	53	232	295	5.7226	9.5655	1	34	292	327	9.78456	18.6431	7	72	360	439	11.2593	17.0089	1	29	72	102	10.4744	4.41176	2	22	184	208	7.73522	10.1266	6	136	160	302	8.19316	2.97361
Creseis conica (Eschscholtz, 1829)	epipelagic	7	26	32	65	2.70495	5.47138	10	39	76	125	3.58886	5.85206	15	57	72	144	2.7934	4.66926	19	87	160	266	7.95931	15.1653	8	56	252	316	8.10464	12.2433	9	18	160	187	19.2031	8.08824	4	17	48	69	2.56601	3.3593	15	120	544	679	18.4211	6.6857
Creseis spp.	epipelagic	0	9	792	801	33.3333	67.4242	0	21	1428	1449	41.6021	67.8371	1	16	1776	1793	34.7818	58.1388	0	1	868	869	26.0024	49.5439	0	64	1240	1304	33.4445	50.5231	0	17	1320	1337	137.297	57.8287	0	19	1220	1239	46.0766	60.3213	0	0	5184	5184	140.64	51.0437
Styliola subula (Quoi & Gaimard, 1827)	mesopelagic	3	20	24	47	1.95589	3.95623	6	26	20	52	1.49297	2.43446	12	48	88	148	2.871	4.79896	6	36	36	78	2.33393	4.44698	2	48	48	98	2.51346	3.79698	4	8	24	36	3.69686	1.55709	1	27	24	52	1.9338	2.53165	18	76	64	158	4.28649	1.55573
Cavolinia spp.	epipelagic	0	0	0	0	0	0	0	2	8	10	0.287109	0.468165	1	2	8	11	0.213385	0.35668	0	2	0	2	0.0598444	0.114025	1	1	0	2	0.0512952	0.0774893	0	0	0	0	0	0	0	3	0	3	0.111566	0.146056	2	84	32	118	3.2013	1.16187
Diacria trispinosa (Blainville, 1821)	mesopelagic	0	0	0	0	0	0	0	0	0	0	0	0	0	1	0	1	0.0193986	0.0324254	0	0	0	0	0	0	0	0	0	0	0	0	0	0	0	0	0	0	0	0	0	0	0	0	0	0	0	0	0	0
Clio pyramidata (Linneaus, 1767)	mesopelagic	2	1	0	3	0.124844	0.252525	3	3	4	10	0.287109	0.468165	2	4	8	14	0.271581	0.453956	2	8	8	18	0.5386	1.02623	0	1	4	5	0.128238	0.193723	1	5	0	6	0.616143	0.259516	3	3	8	14	0.52064	0.681597	5	16	0	21	0.569723	0.206774
Clio cuspidata (Bosc, 1801)	mesopelagic	0	0	0	0	0	0	0	0	0	0	0	0	0	0	0	0	0	0	0	1	0	1	0.0299222	0.0570125	0	0	0	0	0	0	0	0	0	0	0	0	0	0	0	0	0	0	0	0	0	0	0	0
Hyalocylis striata (Rang, 1828)	epipelagic	0	0	0	0	0	0	0	0	0	0	0	0	0	0	0	0	0	0	0	0	0	0	0	0	0	0	0	0	0	0	0	0	0	0	0	0	0	0	0	0	0	0	0	0	0	0	0	0
Total						49.4382	100					61.3264	100					59.8254	100					52.4835	100					66.1965	100					237.42	100					76.3853	100					275.529	100
All counting have been calculated for 1g of sediment in the "normalized" column
[truncated: 42 more columns]

## Sheet: AG16-20-BC1b >125um
			Original weight=		24.03				Original weight=		34.83			Original weight=		51.55		Original weight=		33.42				Original weight=		38.99			Original weight=		9.738			Original weight=		26.89			Original weight=		36.86			Original weight=		36.16			Original weight=
		0-1 cm					2-3 cm					4-5 cm					6-7 cm					8-9 cm					10-11 cm					12-13 cm					14-15 cm					16-17 cm					18-19 cm
		>250	125-250	total	normalized	percentage	>250	125-250	total	normalized	percentage	>250	125-250	total	normalized	percentage	>250	125-250	total	normalized	percentage	>250	125-250	total	normalized	percentage	>250	125-250	total	normalized	percentage	>250	125-250	total	normalized	percentage	>250	125-250	total	normalized	percentage	>250	125-250	total	normalized	percentage	>250	125-250	total
Heliconoides inflatus (d'Orbigny, 1935)	mesopelagic	2	15	17	0.707449	9.88372	6	20	26	0.746483	11.0169	3	63	66	1.28031	19.8795	2	29	31	0.927588	12.8099	3	27	30	0.769428	8.31025	6	34	40	4.10762	20	0	21	21	0.780959	12.6506	93	428	521	14.1346	39.3505	68	800	868	24.0044	49.7421	195	900	1095
Limacina bulimoides (d'Orbigny, 1935)	mesopelagic	0	17	17	0.707449	9.88372	1	19	20	0.574218	8.47458	0	30	30	0.581959	9.03614	1	7	8	0.239378	3.30579	1	31	32	0.820723	8.86427	0	37	37	3.79955	18.5	0	37	37	1.37598	22.2892	13	276	289	7.84048	21.8278	0	144	144	3.9823	8.25215	1	0	1
Limacina trochiformis (d'Orbigny, 1935)	epipelagic	2	18	20	0.832293	11.6279	0	29	29	0.832616	12.2881	0	14	14	0.271581	4.21687	0	6	6	0.179533	2.47934	0	39	39	1.00026	10.8033	2	29	31	3.18341	15.5	0	7	7	0.26032	4.21687	0	36	36	0.976668	2.71903	0	24	24	0.663717	1.37536	1	20	21
Creseis acicula (Rang, 1828)	epipelagic	18	32	50	2.08073	29.0698	16	35	51	1.46425	21.6102	10	53	63	1.22211	18.9759	1	34	35	1.04728	14.4628	7	72	79	2.02616	21.8837	1	29	30	3.08071	15	2	22	24	0.892525	14.4578	6	136	142	3.85241	10.7251	3	56	59	1.63164	3.38109	1	4	5
Creseis conica (Eschscholtz, 1829)	epipelagic	7	26	33	1.37328	19.186	10	39	49	1.40683	20.7627	15	57	72	1.3967	21.6867	19	87	106	3.17175	43.8017	8	56	64	1.64145	17.7285	9	18	27	2.77264	13.5	4	17	21	0.780959	12.6506	15	120	135	3.66251	10.1964	21	328	349	9.65155	20	29	132	161
Creseis spp.	epipelagic	0	9	9	0.374532	5.23256	0	21	21	0.602929	8.89831	1	16	17	0.329777	5.12048	0	1	1	0.0299222	0.413223	0	64	64	1.64145	17.7285	0	17	17	1.74574	8.5	0	19	19	0.706582	11.4458	0	0	0	0	0	0	88	88	2.43363	5.04298	0	92	92
Styliola subula (Quoi & Gaimard, 1827)	mesopelagic	3	20	23	0.957137	13.3721	6	26	32	0.918748	13.5593	12	48	60	1.16392	18.0723	6	36	42	1.25673	17.3554	2	48	50	1.28238	13.8504	4	8	12	1.23229	6	1	27	28	1.04128	16.8675	18	76	94	2.55019	7.0997	0	72	72	1.99115	4.12607	0	20	20
Cavolinia spp.	epipelagic	0	0	0	0	0	0	2	2	0.0574218	0.847458	1	2	3	0.0581959	0.903614	0	2	2	0.0598444	0.826446	1	1	2	0.0512952	0.554017	0	0	0	0	0	0	3	3	0.111566	1.80723	2	84	86	2.33315	6.49547	0	72	72	1.99115	4.12607	25	56	81
Diacria trispinosa (Blainville, 1821)	mesopelagic	0	0	0	0	0	0	0	0	0	0	0	1	1	0.0193986	0.301205	0	0	0	0	0	0	0	0	0	0	0	0	0	0	0	0	0	0	0	0	0	0	0	0	0	6	40	46	1.27212	2.6361	3	64	67
Clio pyramidata (Linneaus, 1767)	mesopelagic	2	1	3	0.124844	1.74419	3	3	6	0.172265	2.54237	2	4	6	0.116392	1.80723	2	8	10	0.299222	4.13223	0	1	1	0.0256476	0.277008	1	5	6	0.616143	3	3	3	6	0.223131	3.61446	5	16	21	0.569723	1.5861	7	16	23	0.636062	1.31805	9	4	13
Clio cuspidata (Bosc, 1801)	mesopelagic	0	0	0	0	0	0	0	0	0	0	0	0	0	0	0	0	1	1	0.0299222	0.413223	0	0	0	0	0	0	0	0	0	0	0	0	0	0	0	0	0	0	0	0	0	0	0	0	0	0	0	0
Hyalocylis striata (Rang, 1828)	epipelagic	0	0	0	0	0	0	0	0	0	0	0	0	0	0	0	0	0	0	0	0	0	0	0	0	0	0	0	0	0	0	0	0	0	0	0	0	0	0	0	0	0	0	0	0	0	0	0	0
Total		34	138	172	7.15772	100	42	194	236	6.77577	100	44	288	332	6.44035	100	31	211	242	7.24117	100	22	339	361	9.25878	100	23	177	200	20.5381	100	10	156	166	6.1733	100	152	1172	1324	35.9197	100	105	1640	1745	48.2577	100	264	1292	1556
[truncated: 27 more columns]

## Sheet: AG16-23-BC2 >63um
				Original weight=		8.52	g			Original weight=		8.95	g			Original weight=		8.08	g		Original weight=		12.05	g				Original weight=		9.81	g			Original weight=		8.98	g			Original weight=		15.83	g			Original weight=		11.59	g
		0-1 cm						2-3 cm						4-5 cm						6-7 cm						8-9 cm						10-11 cm						12-13 cm						14-15 cm
		>250	125-250	63-125	total	normalized	percentages	>250	125-250	63-125	total	normalized	percentages	>250	125-250	63-125	total	normalized	percentages	>250	125-250	63-125	total	normalized	percentages	>250	125-250	63-125	total	normalized	percentages	>250	125-250	63-125	total	normalized	percentages	>250	125-250	63-125	total	normalized	percentages	>250	125-250	63-125	total	normalized	percentages
Heliconoides inflatus (d'Orbigny, 1935)	mesopelagic	8	44	44	96	11.2676	8.39895	15	126	128	269	30.0559	8.67742	19	40	88	147	18.1931	5.39846	52	204	368	624	51.7842	9.97921	21	112	440	573	58.4098	10.8154	21	184	248	453	50.4454	9.90164	51	220	896	1167	73.7208	12.5904	88	300	360	748	64.5384	12.6351
Limacina bulimoides (d'Orbigny, 1935)	mesopelagic	0	22	104	126	14.7887	11.0236	7	60	224	291	32.514	9.3871	5	42	208	255	31.5594	9.36467	8	72	424	504	41.8257	8.06013	5	72	416	493	50.2548	9.3054	2	84	360	446	49.6659	9.74863	3	244	992	1239	78.2691	13.3671	9	116	456	581	50.1294	9.81419
Limacina trochiformis (d'Orbigny, 1935)	epipelagic	0	19	40	59	6.92488	5.16185	7	94	104	205	22.905	6.6129	3	50	124	177	21.9059	6.50018	24	172	216	412	34.1909	6.58884	10	98	160	268	27.3191	5.05851	9	160	96	265	29.51	5.79235	23	260	400	683	43.1459	7.36865	30	172	80	282	24.3313	4.76351
Creseis acicula (Rang, 1828)	epipelagic	11	71	84	166	19.4836	14.5232	21	92	144	257	28.7151	8.29032	8	72	152	232	28.7129	8.52001	16	172	432	620	51.4523	9.91524	24	56	504	584	59.5311	11.023	6	152	240	398	44.3207	8.69945	47	180	688	915	57.8016	9.87162	29	340	296	665	57.377	11.2331
Creseis conica (Eschscholtz, 1829)	epipelagic	3	32	28	63	7.39437	5.51181	9	68	120	197	22.0112	6.35484	7	34	148	189	23.3911	6.94087	12	156	344	512	42.4896	8.18807	1	46	328	375	38.2263	7.07814	4	160	192	356	39.6437	7.78142	25	136	656	817	51.6109	8.81433	23	272	504	799	68.9387	13.4966
Creseis spp.	epipelagic	0	31	540	571	67.0188	49.9563	0	36	1672	1708	190.838	55.0968	0	52	1544	1596	197.525	58.6118	0	56	3240	3296	273.527	52.7107	0	16	2880	2896	295.209	54.6621	0	172	2336	2508	279.287	54.8197	0	28	4144	4172	263.55	45.0102	0	0	2544	2544	219.5	42.973
Styliola subula (Quoi & Gaimard, 1827)	mesopelagic	5	27	12	44	5.16432	3.84952	12	38	16	66	7.3743	2.12903	9	38	16	63	7.79703	2.31362	9	44	32	85	7.05394	1.35935	10	20	16	46	4.68909	0.868252	5	40	0	45	5.01114	0.983607	3	40	32	75	4.73784	0.809149	38	52	24	114	9.83607	1.92568
Cavolinia spp.	epipelagic	0	1	0	1	0.117371	0.0874891	2	0	0	2	0.223464	0.0645161	0	2	0	2	0.247525	0.0734484	0	4	0	4	0.33195	0.0639693	1	2	0	3	0.30581	0.0566251	2	0	0	2	0.222717	0.0437158	0	0	0	0	0	0	1	4	0	5	0.431406	0.0844595
Diacria trispinosa (Blainville, 1821)	mesopelagic	0	0	0	0	0	0	0	0	0	0	0	0	0	0	0	0	0	0	0	0	8	8	0.6639	0.127939	0	0	8	8	0.815494	0.151	0	0	0	0	0	0	0	0	0	0	0	0	0	0	0	0	0	0
Clio pyramidata (Linneaus, 1767)	mesopelagic	2	10	4	16	1.87793	1.39983	9	32	64	105	11.7318	3.3871	5	36	20	61	7.5495	2.24018	8	52	128	188	15.6017	3.00656	6	22	24	52	5.30071	0.981502	6	36	56	98	10.9131	2.14208	13	76	112	201	12.6974	2.16852	14	72	96	182	15.7032	3.07432
Clio cuspidata (Bosc, 1801)	mesopelagic	0	0	0	0	0	0	0	0	0	0	0	0	1	0	0	1	0.123762	0.0367242	0	0	0	0	0	0	0	0	0	0	0	0	0	4	0	4	0.445434	0.0874317	0	0	0	0	0	0	0	0	0	0	0	0
Hyalocylis striata (Rang, 1828)	epipelagic	0	0	0	0	0	0	0	0	0	0	0	0	0	0	0	0	0	0	0	0	0	0	0	0	0	0	0	0	0	0	0	0	0	0	0	0	0	0	0	0	0	0	0	0	0	0	0	0
Peracle reticulata (d'Orbigny, 1935)	mesopelagic	1	0	0	1	0.117371	0.0874891	0	0	0	0	0	0	0	0	0	0	0	0	0	0	0	0	0	0	0	0	0	0	0	0	0	0	0	0	0	0	0	0	0	0	0	0	0	0	0	0	0	0
Total						134.155	100					346.369	100					337.005	100					518.921	100					540.061	100					509.465	100					585.534	100					510.785	100
All counting have been calculated for 1g of sediment in the "normalized" column
[truncated: 72 more columns]

## Sheet: AG16-23-BC2 >125um
			Original weight=		8.52				Original weight=		8.95			Original weight=		8.08		Original weight=		12.05				Original weight=		9.81			Original weight=		8.98			Original weight=		15.83			Original weight=		11.59			Original weight=		6.99			Original weight=
		0-1 cm					2-3 cm					4-5 cm					6-7 cm					8-9 cm					10-11 cm					12-13 cm					14-15 cm					16-17 cm					18-19 cm
		>250	125-250	total	normalized	percentage	>250	125-250	total	normalized	percentage	>250	125-250	total	normalized	percentage	>250	125-250	total	normalized	percentage	>250	125-250	total	normalized	percentage	>250	125-250	total	normalized	percentage	>250	125-250	total	normalized	percentage	>250	125-250	total	normalized	percentage	>250	125-250	total	normalized	percentage	>250	125-250	total
Heliconoides inflatus (d'Orbigny, 1935)	mesopelagic	8	44	52	6.10329	18.1185	15	126	141	15.7542	22.4522	19	40	59	7.30198	13.948	52	204	256	21.2448	24.1282	21	112	133	13.5576	25.4789	21	184	205	22.8285	19.5798	51	220	271	17.1194	20.089	88	300	388	33.4771	24.8718	40	116	156	22.3176	23.3184	73	228	301
Limacina bulimoides (d'Orbigny, 1935)	mesopelagic	0	22	22	2.58216	7.66551	7	60	67	7.48603	10.6688	5	42	47	5.81683	11.1111	8	72	80	6.639	7.54006	5	72	77	7.84913	14.751	2	84	86	9.57684	8.21394	3	244	247	15.6033	18.3099	9	116	125	10.7852	8.01282	1	74	75	10.7296	11.2108	1	180	181
Limacina trochiformis (d'Orbigny, 1935)	epipelagic	0	19	19	2.23005	6.62021	7	94	101	11.2849	16.0828	3	50	53	6.55941	12.5296	24	172	196	16.2656	18.4731	10	98	108	11.0092	20.6897	9	160	169	18.8196	16.1414	23	260	283	17.8774	20.9785	30	172	202	17.4288	12.9487	12	104	116	16.5951	17.3393	34	216	250
Creseis acicula (Rang, 1828)	epipelagic	11	71	82	9.62441	28.5714	21	92	113	12.6257	17.9936	8	72	80	9.90099	18.9125	16	172	188	15.6017	17.7191	24	56	80	8.15494	15.3257	6	152	158	17.5947	15.0907	47	180	227	14.3399	16.8273	29	340	369	31.8378	23.6538	13	82	95	13.5908	14.2003	19	88	107
Creseis conica (Eschscholtz, 1829)	epipelagic	3	32	35	4.10798	12.1951	9	68	77	8.60335	12.2611	7	34	41	5.07426	9.69267	12	156	168	13.9419	15.8341	1	46	47	4.79103	9.00383	4	160	164	18.2628	15.6638	25	136	161	10.1706	11.9348	23	272	295	25.453	18.9103	10	94	104	14.8784	15.5456	20	188	208
Creseis spp.	epipelagic	0	31	31	3.6385	10.8014	0	36	36	4.02235	5.73248	0	52	52	6.43564	12.2931	0	56	56	4.6473	5.27804	0	16	16	1.63099	3.06513	0	172	172	19.1537	16.4279	0	28	28	1.76879	2.07561	0	0	0	0	0	0	22	22	3.14735	3.28849	0	12	12
Styliola subula (Quoi & Gaimard, 1827)	mesopelagic	5	27	32	3.75587	11.1498	12	38	50	5.58659	7.96178	9	38	47	5.81683	11.1111	9	44	53	4.39834	4.99529	10	20	30	3.0581	5.74713	5	40	45	5.01114	4.29799	3	40	43	2.71636	3.18755	38	52	90	7.76531	5.76923	18	38	56	8.01144	8.3707	28	44	72
Cavolinia spp.	epipelagic	0	1	1	0.117371	0.348432	2	0	2	0.223464	0.318471	0	2	2	0.247525	0.472813	0	4	4	0.33195	0.377003	1	2	3	0.30581	0.574713	2	0	2	0.222717	0.191022	0	0	0	0	0	1	4	5	0.431406	0.320513	0	4	4	0.572246	0.597907	4	0	4
Diacria trispinosa (Blainville, 1821)	mesopelagic	0	0	0	0	0	0	0	0	0	0	0	0	0	0	0	0	0	0	0	0	0	0	0	0	0	0	0	0	0	0	0	0	0	0	0	0	0	0	0	0	0	0	0	0	0	0	0	0
Clio pyramidata (Linneaus, 1767)	mesopelagic	2	10	12	1.40845	4.18118	9	32	41	4.58101	6.52866	5	36	41	5.07426	9.69267	8	52	60	4.97925	5.65504	6	22	28	2.85423	5.36398	6	36	42	4.67706	4.01146	13	76	89	5.62224	6.59748	14	72	86	7.42019	5.51282	5	36	41	5.86552	6.12855	17	76	93
Clio cuspidata (Bosc, 1801)	mesopelagic	0	0	0	0	0	0	0	0	0	0	1	0	1	0.123762	0.236407	0	0	0	0	0	0	0	0	0	0	0	4	4	0.445434	0.382044	0	0	0	0	0	0	0	0	0	0	0	0	0	0	0	1	0	1
Hyalocylis striata (Rang, 1828)	epipelagic	0	0	0	0	0	0	0	0	0	0	0	0	0	0	0	0	0	0	0	0	0	0	0	0	0	0	0	0	0	0	0	0	0	0	0	0	0	0	0	0	0	0	0	0	0	0	0	0
Peracle reticulata (d'Orbigny, 1935)	mesopelagic	1	0	1	0.117371	0.348432			0	0	0				0	0				0	0									0	0				0	0				0	0				0	0
Total		30	257	287	33.6854	100	82	546	628	70.1676	100	57	366	423	52.3515	100	129	932	1061	88.0498	100	78	444	522	53.211	100	55	992	1047	116.592	100	165	1184	1349	85.2179	100	232	1328	1560	134.599	100	99	570	669	95.7082	100	197	1032	1229
[truncated: 52 more columns]

## Sheet: AG16-25-BC1a >63um
				Original weight=		5.25	g			Original weight=		13.63	g			Original weight=		17.645	g		Original weight=		22.821		g			Original weight=		21.062	g			Original weight=		24.853	g			Original weight=		22.356	g			Original weight=		24.121	g
		0-1 cm						2-3 cm						4-5 cm						6-7 cm						8-9 cm						10-11 cm						12-13 cm						14-15 cm
		>250	125-250	63-125	total	normalized	percentage	>250	125-250	63-125	total	normalized	percentage	>250	125-250	63-125	total	normalized	percentage	>250	125-250	63-125	total	normalized	percentage	>250	125-250	63-125	total	normalized	percentage	>250	125-250	63-125	total	normalized	percentage	>250	125-250	63-125	total	normalized	percentage	>250	125-250	63-125	total	normalized	percentage
Heliconoides inflatus (d'Orbigny, 1935)	mesopelagic	356	808	592	1756	334.476	27.6884	334	1040	2432	3806	279.237	20.0908	468	1232	1568	3268	185.208	25.5952	584	1736	2432	4752	208.229	21.3746	700	2056	2752	5508	261.514	25.8689	613	1984	4576	7173	288.617	17.8433	340	1136	2944	4420	197.71	16.5271	222	1360	2528	4110	170.391	17.2754
Limacina bulimoides (d'Orbigny, 1935)	mesopelagic	26	264	80	370	70.4762	5.83412	24	296	384	704	51.6508	3.71622	48	344	288	680	38.5378	5.32581	60	192	768	1020	44.6957	4.58798	31	520	448	999	47.4314	4.6919	88	344	2368	2800	112.662	6.96517	22	488	832	1342	60.0286	5.01795	26	584	512	1122	46.5155	4.71607
Limacina trochiformis (d'Orbigny, 1935)	epipelagic	98	544	32	674	128.381	10.6276	108	584	448	1140	83.639	6.01774	124	640	256	1020	57.8067	7.98872	216	744	608	1568	68.7086	7.0529	259	1352	1056	2667	126.626	12.5258	242	1072	800	2114	85.0602	5.25871	83	616	416	1115	49.8748	4.16916	44	480	704	1228	50.91	5.16162
Creseis acicula (Rang, 1828)	epipelagic	28	152	240	420	80	6.62252	34	176	1920	2130	156.273	11.2437	44	144	576	764	43.2984	5.98371	24	440	672	1136	49.7787	5.10975	46	192	608	846	40.1671	3.97332	39	128	1504	1671	67.2353	4.15672	8	56	416	480	21.4707	1.7948	11	64	384	459	19.0291	1.9293
Creseis conica (Eschscholtz, 1829)	epipelagic	32	208	336	576	109.714	9.08231	32	360	1792	2184	160.235	11.5287	60	416	704	1180	66.8745	9.24185	32	1152	992	2176	95.3508	9.78769	32	496	1216	1744	82.8032	8.19087	56	752	2336	3144	126.504	7.8209	25	328	1536	1889	84.4963	7.06327	19	312	1344	1675	69.4416	7.04048
Creseis spp.	epipelagic	0	8	1824	1832	348.952	28.8868	0	16	7232	7248	531.768	38.2601	0	8	4448	4456	252.536	34.8997	0	8	9152	9160	401.385	41.2019	0	16	7648	7664	363.878	35.9947	0	24	19680	19704	792.822	49.0149	0	0	15424	15424	689.927	57.6727	0	32	13280	13312	551.884	55.9539
Styliola subula (Quoi & Gaimard, 1827)	mesopelagic	98	392	144	634	120.762	9.99685	76	544	1024	1644	120.616	8.67821	132	728	416	1276	72.3151	9.99373	112	1008	1152	2272	99.5574	10.2195	146	824	768	1738	82.5183	8.16269	159	808	2464	3431	138.052	8.53483	60	520	1408	1988	88.9247	7.43344	34	600	1152	1786	74.0434	7.50704
Cavolinia spp.	epipelagic	2	8	0	10	1.90476	0.157679	4	0	0	4	0.29347	0.0211149	0	24	0	24	1.36016	0.18797	4	8	0	12	0.525831	0.0539763	2	8	0	10	0.474789	0.046966	8	24	0	32	1.28757	0.079602	1	8	0	9	0.402576	0.0336524	0	8	0	8	0.331661	0.0336262
Diacria trispinosa (Blainville, 1821)	mesopelagic	0	0	0	0	0	0	0	0	0	0	0	0	0	0	0	0	0	0	0	0	0	0	0	0	0	0	0	0	0	0	0	0	0	0	0	0	0	0	0	0	0	0	0	0	0	0	0	0
Clio pyramidata (Linneaus, 1767)	mesopelagic	18	40	0	58	11.0476	0.914538	10	40	0	50	3.66838	0.263936	8	64	0	72	4.08048	0.56391	20	72	0	92	4.03137	0.413818	36	32	0	68	3.22856	0.319369	65	48	0	113	4.54673	0.281095	13	40	0	53	2.37073	0.198175	9	48	32	89	3.68973	0.374091
Clio cuspidata (Bosc, 1801)	mesopelagic	2	8	0	10	1.90476	0.157679	2	8	0	10	0.733676	0.0527872	0	0	0	0	0	0	4	8	0	12	0.525831	0.0539763	1	0	0	1	0.0474789	0.0046966	0	0	0	0	0	0	0	8	0	8	0.357846	0.0299133	1	0	0	1	0.0414577	0.00420327
Hyalocylis striata (Rang, 1828)	epipelagic	0	0	0	0	0	0	0	0	0	0	0	0	0	0	0	0	0	0	0	0	0	0	0	0	1	0	0	1	0.0474789	0.0046966	0	0	0	0	0	0	0	0	0	0	0	0	0	0	0	0	0	0
Peracle reticulata (d'Orbigny, 1935)	mesopelagic	2	0	0	2	0.380952	0.0315358	8	16	0	24	1.76082	0.126689	12	16	0	28	1.58685	0.219298	16	16	0	32	1.40222	0.143937	22	24	0	46	2.18403	0.216044	2	16	0	18	0.724259	0.0447761	0	16	0	16	0.715692	0.0598265	1	0	0	1	0.0414577	0.00420327
Total						1208	100				18944	1389.88	100				12768	723.604	100				22232	974.19	100				21292	1010.92	100				40200	1617.51	100				26744	1196.28	100				23791	986.319	100
All counting have been calculated for 1g of sediment in the "normalized" column
[truncated: 66 more columns]

## Sheet: AG16-25-BC1a >125um
			Original weight=		5.25				Original weight=		13.63			Original weight=		17.645		Original weight=		22.821				Original weight=		21.062			Original weight=		24.853			Original weight=		22.356			Original weight=		24.121			Original weight=		23.991			Original weight=
		0-1 cm					2-3 cm					4-5 cm					6-7 cm					8-9 cm					10-11 cm					12-13 cm					14-15 cm					16-17 cm					18-19 cm
		>250	125-250	total	normalized	percentage	>250	125-250	total	normalized	percentage	>250	125-250	total	normalized	percentage	>250	125-250	total	normalized	percentage	>250	125-250	total	normalized	percentage	>250	125-250	total	normalized	percentage	>250	125-250	total	normalized	percentage	>250	125-250	total	normalized	percentage	>250	125-250	total	normalized	percentage	>250	125-250	total
Heliconoides inflatus (d'Orbigny, 1935)	mesopelagic	356	808	1164	221.714	37.6212	334	1040	1374	100.807	37.0151	468	1232	1700	96.3446	37.6773	584	1736	2320	101.661	35.9356	700	2056	2756	130.852	40.5533	613	1984	2597	104.494	40.1267	340	1136	1476	66.0225	39.172	222	1360	1582	65.586	41.0376	147	1128	1275	53.1449	39.6579	161	848	1009
Limacina bulimoides (d'Orbigny, 1935)	mesopelagic	26	264	290	55.2381	9.37298	24	296	320	23.4776	8.62069	48	344	392	22.2159	8.68794	60	192	252	11.0425	3.90335	31	520	551	26.1609	8.10771	88	344	432	17.3822	6.67491	22	488	510	22.8127	13.535	26	584	610	25.2892	15.8236	4	600	604	25.1761	18.7869	8	312	320
Limacina trochiformis (d'Orbigny, 1935)	epipelagic	98	544	642	122.286	20.7498	108	584	692	50.7704	18.6422	124	640	764	43.2984	16.9326	216	744	960	42.0665	14.8699	259	1352	1611	76.4885	23.7051	242	1072	1314	52.8709	20.3028	83	616	699	31.2668	18.551	44	480	524	21.7238	13.5927	39	456	495	20.6327	15.3966	16	408	424
Creseis acicula (Rang, 1828)	epipelagic	28	152	180	34.2857	5.81771	34	176	210	15.4072	5.65733	44	144	188	10.6546	4.16667	24	440	464	20.3322	7.18711	46	192	238	11.3	3.50206	39	128	167	6.71951	2.58035	8	56	64	2.86277	1.69851	11	64	75	3.10932	1.94553	29	72	101	4.20991	3.14152	6	56	62
Creseis conica (Eschscholtz, 1829)	epipelagic	32	208	240	45.7143	7.75695	32	360	392	28.7601	10.5603	60	416	476	26.9765	10.5496	32	1152	1184	51.882	18.3395	32	496	528	25.0688	7.76928	56	752	808	32.5112	12.4845	25	328	353	15.7899	9.36837	19	312	331	13.7225	8.58625	22	288	310	12.9215	9.6423	10	144	154
Creseis spp.	epipelagic	0	8	8	1.52381	0.258565	0	16	16	1.17388	0.431034	0	8	8	0.453386	0.177305	0	8	8	0.350554	0.123916	0	16	16	0.759662	0.235433	0	24	24	0.965678	0.370828	0	0	0	0	0	0	32	32	1.32664	0.830091	0	48	48	2.00075	1.493	0	64	64
Styliola subula (Quoi & Gaimard, 1827)	mesopelagic	98	392	490	93.3333	15.8371	76	544	620	45.4879	16.7026	132	728	860	48.739	19.0603	112	1008	1120	49.0776	17.3482	146	824	970	46.0545	14.2731	159	808	967	38.9088	14.9413	60	520	580	25.9438	15.3928	34	600	634	26.2842	16.4462	26	328	354	14.7555	11.0109	11	384	395
Cavolinia spp.	epipelagic	2	8	10	1.90476	0.323206	4	0	4	0.29347	0.107759	0	24	24	1.36016	0.531915	4	8	12	0.525831	0.185874	2	8	10	0.474789	0.147145	8	24	32	1.28757	0.494438	1	8	9	0.402576	0.238854	0	8	8	0.331661	0.207523	3	16	19	0.791964	0.59098	2	0	2
Diacria trispinosa (Blainville, 1821)	mesopelagic	0	0	0	0	0	0	0	0	0	0	0	0	0	0	0	0	0	0	0	0	0	0	0	0	0	0	0	0	0	0	0	0	0	0	0	0	0	0	0	0	0	0	0	0	0	0	0	0
Clio pyramidata (Linneaus, 1767)	mesopelagic	18	40	58	11.0476	1.8746	10	40	50	3.66838	1.34698	8	64	72	4.08048	1.59574	20	72	92	4.03137	1.42503	36	32	68	3.22856	1.00059	65	48	113	4.54673	1.74598	13	40	53	2.37073	1.40658	9	48	57	2.36309	1.4786	9	0	9	0.375141	0.279938	3	8	11
Clio cuspidata (Bosc, 1801)	mesopelagic	2	8	10	1.90476	0.323206	2	8	10	0.733676	0.269397	0	0	0	0	0	4	8	12	0.525831	0.185874	1	0	1	0.0474789	0.0147145	0	0	0	0	0	0	8	8	0.357846	0.212314	1	0	1	0.0414577	0.0259403	0	0	0	0	0	2	0	2
Hyalocylis striata (Rang, 1828)	epipelagic	0	0	0	0	0	0	0	0	0	0	0	0	0	0	0	0	0	0	0	0	1	0	1	0.0474789	0.0147145	0	0	0	0	0	0	0	0	0	0	0	0	0	0	0	0	0	0	0	0	0	0	0
Peracle reticulata (d'Orbigny, 1935)	mesopelagic	2	0	2	0.380952	0.0646412	8	16	24	1.76082	0.646552	12	16	28	1.58685	0.620567	16	16	32	1.40222	0.495663	22	24	46	2.18403	0.676869	2	16	18	0.724259	0.278121	0	16	16	0.715692	0.424628	1	0	1	0.0414577	0.0259403	0	0	0	0	0	0	0	0
		662	2432	3094	589.333	100	632	3080	3712	272.34	100	896	3616	4512	255.71	100	1072	5384	6456	282.897	100	1276	5520	6796	322.666	100	1272	5200	6472	260.411	100	552	3216	3768	168.545	100	367	3488	3855	159.819	100	279	2936	3215	134.009	100	219	2224	2443
[truncated: 47 more columns]

## Sheet: Indices
	AG16-20-BC1b				AG16-23-BC2				AG16-25-BC1a
		d	H'			d	H'			d	H'
	0-1	1.79454	1.20713		0-1	1.63328	1.58261		0-1	1.4091	1.81198
	2-3	1.94353	1.20879		2-3	1.36811	1.52516		2-3	1.38179	1.7183
	4-5	2.19972	1.4301		4-5	1.54637	1.44559		4-5	1.3669	1.74746
	6-7	2.27244	1.49066		6-7	1.4396	1.56077		6-7	1.45315	1.67633
	8-9	1.90811	1.506		8-9	1.43046	1.47378		8-9	1.58991	1.69511
	10-11	1.27975	1.38116		10-11	1.44384	1.49891		10-11	1.21809	1.56468
	12-13	1.84511	1.33823		12-13	1.09847	1.64609		12-13	1.41104	1.37201
	14-15	1.42382	1.38267		14-15	1.28288	1.70214		14-15	1.45054	1.40706
	16-17	1.644	1.12431		16-17	1.30495	1.67985		16-17	1.14827	1.22083
	18-19	1.57476	1.06409		18-19	1.46118	1.70859		18-19	1.2632	1.45033
	20-21	1.64894	0.950366		20-21	1.25863	1.43334		20-21	1.41201	1.58285
	22-23	1.9009	0.896108		22-23	1.57591	1.3902		22-23	1.40036	1.55718
	24-25	1.90432	1.15406		24-25	1.39501	1.45991		24-25	1.33931	1.41394
	26-27	1.46145	1.13017		26-27	1.5421	1.57112		26-27	1.37723	1.14303
	28-29	1.25051	0.804655		28-29	1.29217	1.55649		28-29	1.32461	1.18426
					30-31	1.64893	1.5498		30-31	1.42152	1.1333
					32-33	1.55193	1.59226		32-33	1.26805	1.10792
					34-35	1.48906	1.28137		34-35	1.35404	1.16424
					36-37	1.63731	1.4935		36-37	1.62496	0.992024
					37-38	1.71097	1.45983

## Sheet: Dating
k						Unmodelled (cal BP)			Modelled (cal BP)
						from	to	%	from	to
Core	Core Depth	Material	Sample ID	14C-age	1σ error	DelR= - 94±94
	in cm			(years BP)	(± years)	-282.5	94.5	95.45	-278	82.5
AG16-20-BC1b	2-7.	Bf Cibicidoides pachyderma	ETH-115056	1430	20	1145	680	95.45	1122	680
AG16-20-BC1b	14-15	Bf Cibicidoides pachyderma	ETH-115057	2876	21	2816	2305	95.45	2820	2317
AG16-20-BC1b	22-25	Bf-Cibicidoides pachyderma	ETH-115058	3470	21	3555	2999	95.45	3542	3024
AG16-23-BC2	0-5	Pf-G.ruber and T.sacculifer	ETH-117606	1654	23	1355	908	95.45	1347	917
AG16-23-BC2	6-9.	Pf-G.ruber and T.sacculifer	ETH-117607	2633	24	2584	1978	95.45	2537	1984
AG16-23-BC2	26-27	Pf-G.ruber and T.sacculifer	ETH-117608	3272	24	3319	2775	95.45	3307	2775
AG16-23-BC2	28-29	Pf-G.ruber and T.sacculifer	ETH-117609	3694	24	3849	3295	95.45	3830	3306
AG16-23-BC2	36-37	Pf-G.ruber and T.sacculifer	ETH-117610	4473	25	4845	4285	95.45	4836	4293
AG16-25-BC1a	4-5.	Pf-G.ruber and T.sacculifer	ETH-117611	1299	23	998	560	95.45	976	556
AG16-25-BC1a	20-21	Pf-G.ruber and T.sacculifer	ETH-117612	3427	24	3494	2940	95.45	3479	2955
AG16-25-BC1a	34-35	Pf-G.ruber and T.sacculifer	ETH-117613	5296	26	5831	5315	95.45	5802	5313
