# Supplementary material for: Late Holocene pteropod distribution across the base of the south-eastern Mediterranean margin: the importance of the > 63 µm fraction
Source: Copernicus journal article supplement (doi:10.5194/jm-42-13-2023), 2023-03-17
Supplement: Supplementary file 3 [file SM2-geochem.xlsx]

## Sheet: AG16-20-BC1b
AG16-20-BC1b	Sand %	Total Organic Carbon (TOC %)	Carbonates (%)	δ18O (VPDB) G. ruber
0-1 cm	0.207	0.645022	8.96351	-0.218044
2-3 cm	0.283	0.581604	7.94323	0.286722
4-5 cm	0.506	0.613896	7.89987	-0.135294
6-7 cm	0.499	0.530784	7.95677	-0.0913737
8-9 cm	0.654	0.525807	7.8264	-0.118814
10-11 cm	0.359	0.550955	8.18388	-0.221399
12-13 cm	0.409	0.504184	8.61336	-0.110415
14-15 cm	1.249	0.430407	12.3482	-0.695706
16-17 cm	1.42	0.392113	14.826	-0.545979
18-19 cm	1.134	0.341845	18.333	-0.970811
20-21 cm	0.763	0.991844	17.8787	-1.27937
22-23 cm	1.693	1.10291	19.5465	-1.0264
24-25 cm	0.898	0.972717	18.402	-1.43372
26-27 cm	1.169	1.15827	21.7862	-0.878498
28-29 cm	0.954	0.720996	18.1993	-0.521672

## Sheet: AG16-23-BC2
AG16-23-BC2	Sand %	Total Organic Carbon (TOC %)	Carbonates (%)	δ18O (VPDB) G. ruber
0-1 cm	2.3	0.616536	18.2856	-0.444944
2-3 cm	4.03	0.542712	17.3598	0.887179
4-5 cm	3.39	0.426682	19.4558	0.567561
6-7 cm	3.75	0.493401	17.1013	0.760536
8-9 cm	2.85	0.405741	20.7152	0.0873395
10-11 cm	5.85	0.401697	21.0117	1.75267
12-13 cm	3.83	0.385886	22.5583	1.4297
14-15 cm	4.92	0.362983	27.3132
16-17 cm	5.81	0.370107	21.0382	0.0293341
18-19 cm	5.47	0.352194	25.7969	1.52094
20-21 cm	7	0.363255	28.5622	1.0894
22-23 cm	6.25	0.374292	30.3402	1.29268
24-25 cm	8.84	0.339722	32.7021
26-27 cm	8.18	0.300046	34.5958	2.03975
28-29 cm	8.27	0.314291	36.7129	1.63354
30-31 cm	9.5	0.245146	37.7853	1.55918
32-33 cm	9.23	0.284351	39.1582	1.36472
34-35 cm	12.29	0.334114	39.5718	1.22583
36-37 cm	10.31	0.301823	39.1185	1.37102
37-38 cm	12.02	0.282403	42.9757	1.02491

## Sheet: AG16-25-BC1a
Sand, carbonates and TOC in (%) in Cores AG.20-BC1b, AG16-23-BC2, AG16-23-BC1a
AG16-25-BC1a	Sand %	Total Organic Carbon (TOC %)	Carbonates (%)	δ18O (VPDB) G. ruber
0-1 cm	8.19048	0.486963	28.4811	-0.72773
2-3 cm	4.92296	0.385807	27.3091	-0.228175
4-5 cm	4.48286	0.41016	26.3237	0.5302
6-7 cm	5.05236	0.385515	26.8134	-1.36678
8-9 cm	4.95205	0.380392	33.2386	0.771365
10-11 cm	5.38768	0.343477	32.5751	0.983019
12-13 cm	3.98998	0.370766	31.2185	0.881706
14-15 cm	2.99739	0.308597	30.6834	0.550155
16-17 cm	3.24705	0.293477	27.9869	0.186381
18-19 cm	4.28858	0.291877	25.8418	-0.00719458
20-21 cm	4.4468	0.270395	25.3894	-0.0110557
22-23 cm	4.85351	0.21478	25.4972	-0.30136
24-25 cm	4.47549	0.219189	23.7101	-0.505685
26-27 cm	4.07094	0.207658	23.0596	0.276372
28-29 cm	3.15972	0.25323	22.2677	-0.150501
30-31 cm	3.29332	0.255455	21.1826	-0.0937145
32-33 cm	4.04587	0.315725	21.9913	-0.257383
34-35 cm	3.81938	0.442094	21.4348	-0.0803256
36-37 cm	4.02837	0.511166	21.4823	-0.517594
